# Supplementary material for: Nanopore sequencing reveals endogenous NMD-targeted isoforms in human cells
Source: PubMed Central journal article supplement (PMC8361881; doi:10.1186/s13059-021-02439-3), 2021-08-13
Supplement: 13059_2021_2439_MOESM1_ESM.pdf [file 13059_2021_2439_MOESM1_ESM.pdf]

# Supplementary Figures

## **Nanopore sequencing reveals endogenous NMD-targeted isoforms in human cells**

Evangelos D. Karousis, Foivos Gypas, Mihaela Zavolan and Oliver Mühlemann

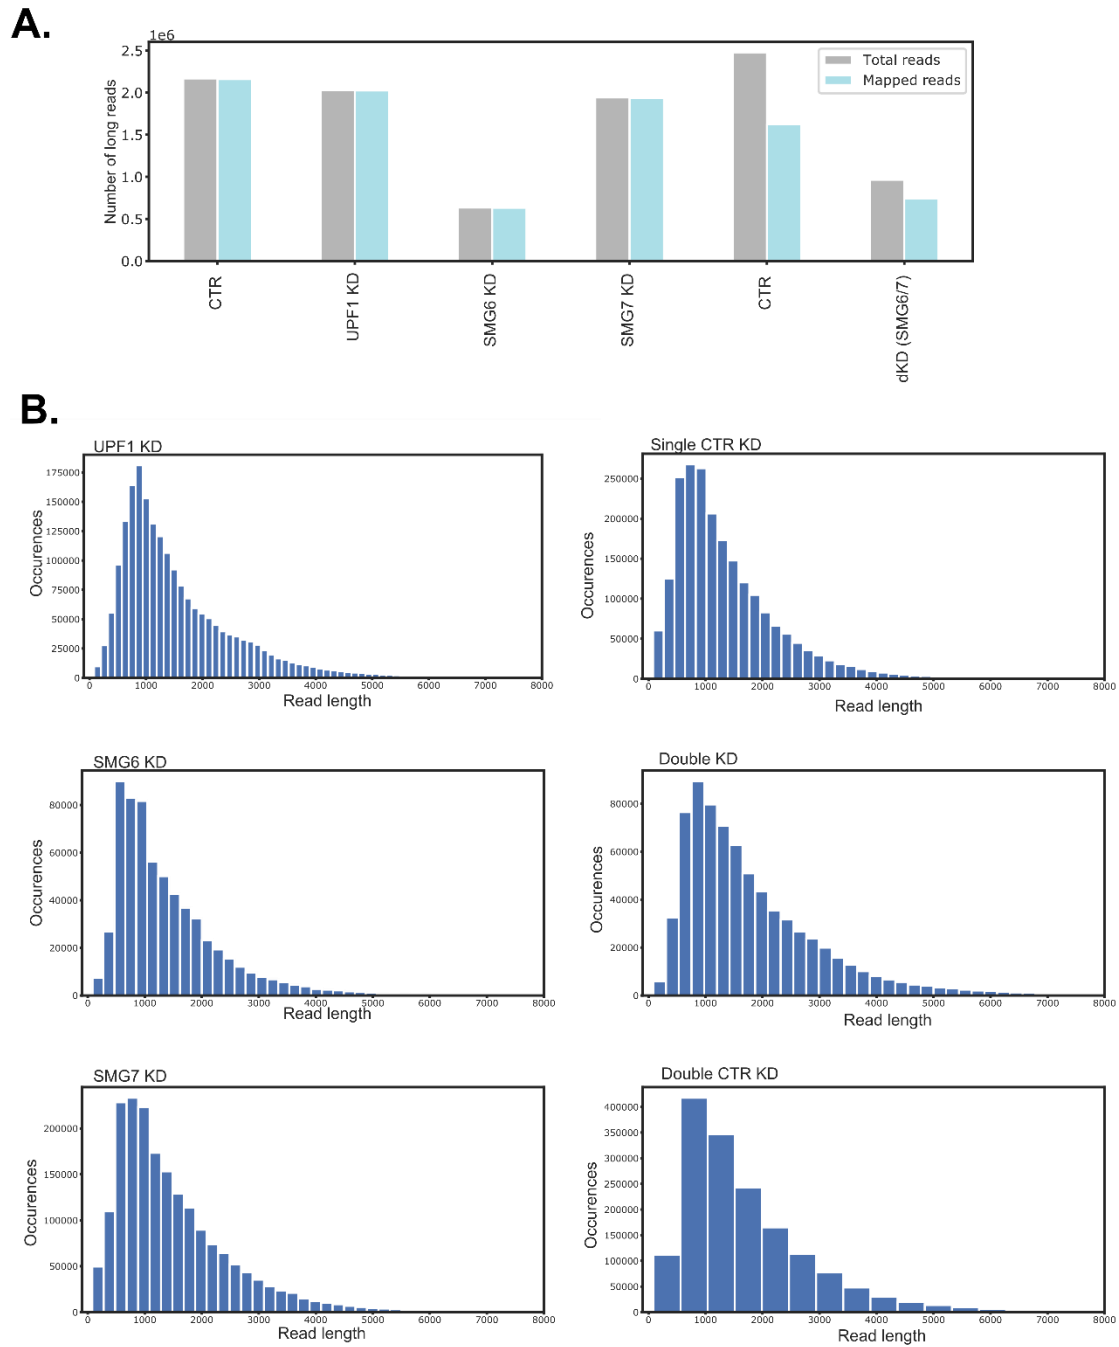

**Figure S1 (A)** Number of totally sequenced (grey) and mapped Nanopore reads (light blue) in the different cDNA sequencing experiments of reverse-transcribed total RNA from cells with the indicated knockdowns. **(B)** Read length distribution of mapped reads from the long-read cDNA sequencing experiments indicated in (A).

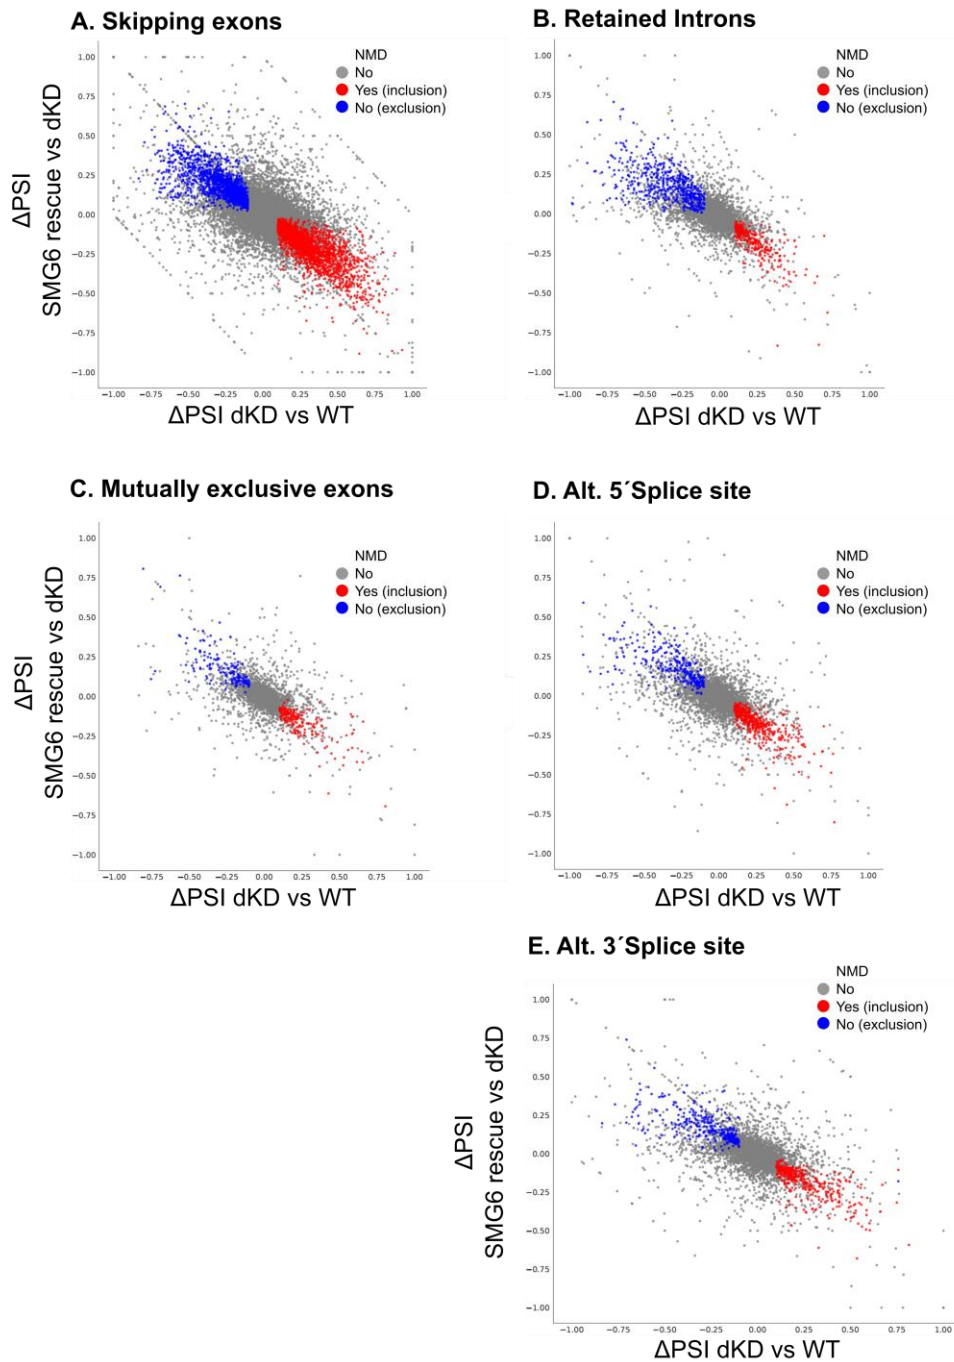

**Figure S2 (A-E)** Scatter plots comparing the change in "percent spliced in" ( $\Delta$ PSI) of exons in CTR versus dKD (x-axis) and SMG6 rescue versus dKD (y-axis). Coloured in red are significant exon inclusion and in blue significant exon exclusion events. Non-significant events are depicted in grey.

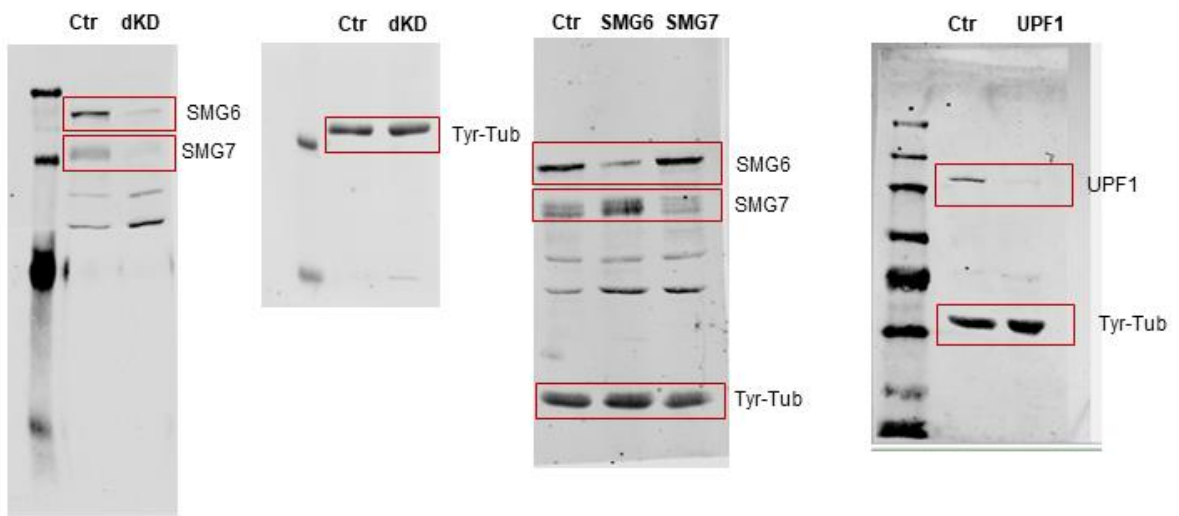

**Figure S3** Uncropped Western blots
